# Supplementary material for: New polymorphism for BaTi(IO3)6 with two polymorphs crystallizing in the same space group
Source: Royal Society of Chemistry journal article supplement (doi:10.1039/d0dt00593b), 2020-01-01
Supplement: d0dt00593b1.pdf [file d0dt00593b1.pdf]

# **New Polymorphism for BaTi(IO<sub>3</sub>)<sub>6</sub> with Two Polymorphs Crystallizing in the Same Space Group**

Zhen Qian,<sup>a</sup> Hongping Wu,<sup>a</sup> Hongwei Yu,<sup>a\*</sup> Zhanggui Hu,<sup>a</sup> Jiyang Wang,<sup>a</sup> and  
Yicheng Wu<sup>a</sup>

<sup>a</sup>*Tianjin Key Laboratory of Functional Crystal Materials, Institute of Functional  
Crystal, Tianjin University of Technology, Tianjin 300384, China.*

## **CONTENTS**

- 1. Table S1 (Crystal data and structure refinement) .....S4**
- 2. Table S2 (Crystal data and structure refinement at low temperature) ...S5**
- 3. Table S3 (Atomic coordinates, displacement parameters and BVS) ...S6**
- 4. Table S4 (Selected bond distances and angles) .....S7**
- 5. Table S5 (The Ba<sup>2+</sup> cations coordinated and Ba-O bonds in  $\alpha$ - and  $\beta$ -  
BaTi(IO<sub>3</sub>)<sub>6</sub>) .....S12**
- 6. Figure S1 (IR spectra for  $\alpha$ - and  $\beta$ -BaTi(IO<sub>3</sub>)<sub>6</sub>) .....S13**
- 7. Figure S2 (The UV-Vis-NIR diffuse reflectance spectra for  $\alpha$ - and  $\beta$ -  
BaTi(IO<sub>3</sub>)<sub>6</sub>) .....S14**
- 8. Figure S3 (The TGA curves of  $\alpha$ - and  $\beta$ -BaTi(IO<sub>3</sub>)<sub>6</sub>) .....S15**
- 9. Figure S4 (The P-XRD of  $\alpha$ -BaTi(IO<sub>3</sub>)<sub>6</sub> after heating at 650 °C) ...S16**

## Experimental Section

*Caution: Hydrofluoric acid is toxic and corrosive! It must be handled with extreme caution and the appropriate protective equipment and training.*

### Materials

BaCl<sub>2</sub>·2H<sub>2</sub>O (Tianjin Fu Chen Chemical Co., Ltd., 99.5%), TiO<sub>2</sub> (Tianjin Fu Chen Chemical Co., Ltd., 99%), HIO<sub>3</sub> (Alfa Aesar, 99.5%), HF (Tianjin Fu Chen Chemical Co., Ltd., 40%) were used as received.

### Hydrothermal Syntheses

$\alpha$ - and  $\beta$ -BaTi(IO<sub>3</sub>)<sub>6</sub> were both synthesized by the hydrothermal methods with the same starting materials and the same temperature program. The difference is that  $\beta$ -BaTi(IO<sub>3</sub>)<sub>6</sub> was synthesized without mineralizers whereas  $\alpha$ -BaTi(IO<sub>3</sub>)<sub>6</sub> was synthesized with 0.5 ml HF as the mineralizer. For  $\alpha$ - and  $\beta$ -BaTi(IO<sub>3</sub>)<sub>6</sub>, 0.200 g ( $0.82 \times 10^{-3}$  mol) of BaCl<sub>2</sub>·2H<sub>2</sub>O, 0.200 g ( $2.50 \times 10^{-3}$  mol) of TiO<sub>2</sub>, 1.400 g ( $7.96 \times 10^{-2}$  mol) of HIO<sub>3</sub> were combined with 5 ml H<sub>2</sub>O, and 0.5 ml HF were combined with 5 mL of H<sub>2</sub>O to  $\alpha$ -BaTi(IO<sub>3</sub>)<sub>6</sub>. The solutions were placed in 23-mL Teflon-lined autoclaves and subsequently sealed. The autoclaves were gradually heated to 220 °C, hold for 3 d, and cooled slowly to room temperature at a rate of 5 °C/h. The mother liquor was decanted from the products. The products were recovered by filtration and washed with water. The white stripe crystals were found in 90% and 85% yield for  $\alpha$ - and  $\beta$ -BaTi(IO<sub>3</sub>)<sub>6</sub> based on BaCl<sub>2</sub>·2H<sub>2</sub>O, respectively.

### Crystallographic Determination

Two transparent colorless bulk single crystals of  $\alpha$ - and  $\beta$ -BaTi(IO<sub>3</sub>)<sub>6</sub> with dimensions of 0.065 x 0.086 x 0.102 and 0.061 x 0.078 x 0.097 mm<sup>3</sup> were selected for the single-crystal structural determination. The diffraction data collection was carried out on a Bruker D8 VENTURE CMOS X-ray source with Mo K $\alpha$  radiation ( $\lambda = 0.71073$  Å) at 293(2) K. Data collection and reduction were performed using the APEX II software, and absorption corrections were acquired based on a multiscan-type model.<sup>1</sup> The crystal structure was solved by direct methods and refined on  $F^2$  by full-matrix least-squares methods using the SHELXTL-97 software package.<sup>2</sup> All nonhydrogen atoms were refined with the anisotropic displacement parameters. The absolute structure was examined for missing symmetry elements using PLATON,<sup>3</sup> and none were found.

Crystal data and structural refinement information for  $\alpha$ - and  $\beta$ -BaTi(IO<sub>3</sub>)<sub>6</sub> are summarized in Table S1. Atomic coordinates and equivalent isotropic displacement parameters as well as calculated bond valence sums (BVS) for  $\alpha$ - and  $\beta$ -BaTi(IO<sub>3</sub>)<sub>6</sub> are collected in Table S2. Selected bond distances are given in Table S3.

### **Powder X-ray Diffraction**

The phase purity of  $\alpha$ - and  $\beta$ -BaTi(IO<sub>3</sub>)<sub>6</sub> were confirmed by using powder X-ray diffraction (PXRD). This study was performed at room temperature on a SmartLab9KW X-ray diffractometer at room temperature (Cu-K $\alpha$  radiation). Data was collected in the  $2\theta$  range of 10-70° with a step size of 0.01° and a step time of 2 s. As seen in Figure 1, the polycrystalline XRD pattern of title compound is in good agreement with the calculated.

### **Infrared Spectroscopy**

The infrared spectra of  $\alpha$ - and  $\beta$ -BaTi(IO<sub>3</sub>)<sub>6</sub> were recorded on a Nicolet iS50 FT-IR spectrometer in the range 500-3500 cm<sup>-1</sup>. The sample of ~10 mg was placed on the test platform for testing.

### **The UV-vis-NIR Diffuse Reflectance Spectra**

The diffuse reflectance spectra of the  $\alpha$ - and  $\beta$ -BaTi(IO<sub>3</sub>)<sub>6</sub> powder samples were measured with a Shimadzu SolidSpec-3700DUV UV/Vis/NIR Spectrophotometer at room temperature in the measurement range from 240 to 2000 nm. Barium sulfate was used as a diffuse reflectance standard.

### **Thermal Analysis**

The thermal analyses were carried out on NETZSCH STA 449C thermal analyzer instrument in an atmosphere of flowing N<sub>2</sub>. The measurement temperatures range from 30 to 800 °C for  $\alpha$ - and  $\beta$ -BaTi(IO<sub>3</sub>)<sub>6</sub>. The heating and cooling rate are 5 °C/min.

### *Reference*

1. R. H. Blessing, *Acta Crystallographica Section A.*, 1995, **51**, 33.
2. G. M. Sheldrick, *SHELXS-97: Program for the Solution of Crystal Structures*, University of Göttingen: Germany, 1997.
3. A. L. Spek, Single-crystal Structure Validation with the Program PLATON, *J. Appl. Crystallogr.*, 2003, **36**, 7.

**Table S1.** Crystal data and structure refinement for  $\alpha$ - and  $\beta$ -BaTi(IO<sub>3</sub>)<sub>6</sub>.

| Empirical formula                                                                                                               | $\alpha$ -BaTi(IO <sub>3</sub> ) <sub>6</sub>      | $\beta$ -BaTi(IO <sub>3</sub> ) <sub>6</sub>       |
|---------------------------------------------------------------------------------------------------------------------------------|----------------------------------------------------|----------------------------------------------------|
| Formula weight                                                                                                                  |                                                    | 1234.64 g/mol                                      |
| Temperature                                                                                                                     |                                                    | 293(2) K                                           |
| Wavelength                                                                                                                      |                                                    | 0.71073 Å                                          |
| Crystal system                                                                                                                  |                                                    | Trigonal                                           |
| space group                                                                                                                     |                                                    | <i>R</i> -3 <i>c</i>                               |
| Unit cell dimensions                                                                                                            | $a = 10.9589(7)$ Å,<br>$c = 11.1331(10)$ Å,        | $a = 11.4412(17)$ Å,<br>$c = 11.1418(17)$ Å,       |
| Z, Volume                                                                                                                       | 1, 1157.93(18) Å <sup>3</sup>                      | 3, 1263.1(4) Å <sup>3</sup>                        |
| Density (g/cm <sup>3</sup> )                                                                                                    | 5.312                                              | 5.177                                              |
| Absorption coefficient (mm <sup>-1</sup> )                                                                                      | 15.150                                             | 18.310                                             |
| <i>F</i> (000)                                                                                                                  | 1620                                               | 1668                                               |
| Theta range for data collection                                                                                                 | 2.82 to 27.49°                                     | 2.75 to 27.50°                                     |
|                                                                                                                                 | -14 ≤ <i>h</i> ≤ 9                                 | -14 ≤ <i>h</i> ≤ 14                                |
|                                                                                                                                 | -11 ≤ <i>k</i> ≤ 14                                | -14 ≤ <i>k</i> ≤ 14                                |
| Limiting indices                                                                                                                | -14 ≤ <i>l</i> ≤ 14                                | -14 ≤ <i>l</i> ≤ 14                                |
| Reflections collected                                                                                                           | 2964                                               | 9462                                               |
| Completeness to theta                                                                                                           | 100 %                                              | 100 %                                              |
| Refinement method                                                                                                               | Full-matrix least-squares on <i>F</i> <sup>2</sup> | Full-matrix least-squares on <i>F</i> <sup>2</sup> |
| Data / restraints / parameters                                                                                                  | 601 / 0 / 41                                       | 646 / 0 / 42                                       |
| Goodness-of-fit on <i>F</i> <sup>2</sup>                                                                                        | 0.712                                              | 1.038                                              |
| Final <i>R</i> indices [ <i>F</i> <sub>o</sub> <sup>2</sup> > 2 <i>s</i> ( <i>F</i> <sub>o</sub> <sup>2</sup> )] <sup>[a]</sup> | $R_1 = 0.0232$ ,<br>$wR_2 = 0.0751$                | $R_1 = 0.0258$ ,<br>$wR_2 = 0.1145$                |
| <i>R</i> indices (all data)                                                                                                     | $R_1 = 0.0261$ ,<br>$wR_2 = 0.0824$                | $R_1 = 0.0287$ ,<br>$wR_2 = 0.1187$                |
| Largest diff. peak and hole (e <sup>-</sup> Å <sup>-3</sup> )                                                                   | 1.016 and -2.575                                   | 1.372 and -1.741                                   |

[a]  $R_1 = \Sigma||F_o| - |F_c||/\Sigma|F_o|$  and  $wR_2 = [\Sigma w(F_o^2 - F_c^2)^2 / \Sigma w F_o^4]^{1/2}$  for  $F_o^2 > 2\sigma(F_o^2)$

**Table S2.** Crystal data and structure refinement for  $\alpha$ - and  $\beta$ -BaTi(IO<sub>3</sub>)<sub>6</sub> at low temperature.

|                                                                                                                        | $\alpha$ -BaTi(IO <sub>3</sub> ) <sub>6</sub>                      | $\beta$ -BaTi(IO <sub>3</sub> ) <sub>6</sub>                       |
|------------------------------------------------------------------------------------------------------------------------|--------------------------------------------------------------------|--------------------------------------------------------------------|
| Empirical formula                                                                                                      | $\alpha$ -BaTi(IO <sub>3</sub> ) <sub>6</sub>                      | $\beta$ -BaTi(IO <sub>3</sub> ) <sub>6</sub>                       |
| Formula weight                                                                                                         |                                                                    | 1234.64 g/mol                                                      |
| Temperature                                                                                                            |                                                                    | 100(2) K                                                           |
| Wavelength                                                                                                             |                                                                    | 0.71073 Å                                                          |
| Crystal system                                                                                                         |                                                                    | Trigonal                                                           |
| space group                                                                                                            |                                                                    | <i>R</i> -3 <i>c</i>                                               |
| Unit cell dimensions                                                                                                   | $a = 10.9180(5)$ Å,<br>$c = 11.0808(6)$ Å,                         | $a = 11.3909(6)$ Å,<br>$c = 11.1056(7)$ Å,                         |
| Z, Volume                                                                                                              | 3, 1143.90(12) Å <sup>3</sup>                                      | 3, 1247.93(15) Å <sup>3</sup>                                      |
| Density (g/cm <sup>3</sup> )                                                                                           | 5.377                                                              | 4.929                                                              |
| Absorption coefficient (mm <sup>-1</sup> )                                                                             | 15.336                                                             | 14.057                                                             |
| <i>F</i> (000)                                                                                                         | 1620                                                               | 1620                                                               |
| Theta range for data collection                                                                                        | 2.832 to 27.471°                                                   | 2.762 to 27.454°                                                   |
|                                                                                                                        | -12 ≤ <i>h</i> ≤ 13                                                | -14 ≤ <i>h</i> ≤ 14                                                |
|                                                                                                                        | -14 ≤ <i>k</i> ≤ 13                                                | -14 ≤ <i>k</i> ≤ 14                                                |
| Limiting indices                                                                                                       | -14 ≤ <i>k</i> ≤ 14                                                | -14 ≤ <i>l</i> ≤ 14                                                |
| Reflections collected                                                                                                  | 3924                                                               | 4208                                                               |
| Completeness to theta                                                                                                  | 100 %                                                              | 100 %                                                              |
| Refinement method                                                                                                      | Full-matrix least-squares on <i>F</i> <sup>2</sup>                 | Full-matrix least-squares on <i>F</i> <sup>2</sup>                 |
| Data / restraints / parameters                                                                                         | 584 / 0 / 31                                                       | 641 / 0 / 42                                                       |
| Goodness-of-fit on <i>F</i> <sup>2</sup>                                                                               | 0.746                                                              | 1.156                                                              |
| Final <i>R</i> indices [ <i>F</i> <sub>o</sub> <sup>2</sup> > 2s( <i>F</i> <sub>o</sub> <sup>2</sup> )] <sup>[a]</sup> | <i>R</i> <sub>1</sub> = 0.0179,<br><i>wR</i> <sub>2</sub> = 0.0773 | <i>R</i> <sub>1</sub> = 0.0317,<br><i>wR</i> <sub>2</sub> = 0.1348 |
| <i>R</i> indices (all data)                                                                                            | <i>R</i> <sub>1</sub> = 0.0212,<br><i>wR</i> <sub>2</sub> = 0.0871 | <i>R</i> <sub>1</sub> = 0.0342,<br><i>wR</i> <sub>2</sub> = 0.1373 |
| Largest diff. peak and hole (e·Å <sup>-3</sup> )                                                                       | 0.859 and -1.031                                                   | 3.285 and -2.689                                                   |

<sup>[a]</sup>  $R_1 = \Sigma ||F_o| - |F_c|| / \Sigma |F_o|$  and  $wR_2 = [\Sigma w(F_o^2 - F_c^2)^2 / \Sigma w F_o^4]^{1/2}$  for  $F_o^2 > 2\sigma(F_o^2)$

**Table S3a.** Atomic coordinates ( $\times 10^4$ ) and equivalent isotropic displacement parameters ( $\text{\AA}^2 \times 10^3$ ) for  $\alpha$ -BaTi(IO<sub>3</sub>)<sub>6</sub>.  $U_{\text{eq}}$  is defined as one-third of the trace of the orthogonalized  $U_{ij}$  tensor.

| Atom | x       | y       | z       | $U_{\text{eq}}$ | BVS   |
|------|---------|---------|---------|-----------------|-------|
| Ba1  | 0       | 0       | 0.5     | 10(2)           | 2.462 |
| Ti1  | 3333    | 6666    | 6666    | 11(5)           | 4.173 |
| I1   | 1146(3) | 4079(3) | 4557(3) | 10(2)           | 5.011 |
| O1   | 1681(4) | 5521(4) | 5675(3) | 12(7)           | 2.167 |
| O2   | 1271(4) | 2875(4) | 5550(3) | 15(8)           | 2.084 |
| O3   | 2740(4) | 4702(4) | 3690(4) | 17(8)           | 1.871 |

**Table S3b.** Atomic coordinates ( $\times 10^4$ ) and equivalent isotropic displacement parameters ( $\text{\AA}^2 \times 10^3$ ) for  $\beta$ -BaTi(IO<sub>3</sub>)<sub>6</sub>.  $U_{\text{eq}}$  is defined as one-third of the trace of the orthogonalized  $U_{ij}$  tensor.

| Atom | x          | y          | z           | $U_{\text{eq}}$ | BVS   |
|------|------------|------------|-------------|-----------------|-------|
| Ba1  | 0          | 0          | 0.38009(19) | 0.0234(4)       | 2.21  |
| Ti1  | 0.333333   | 0.666667   | 0.666667    | 0.0134(7)       | 4.355 |
| I1   | 0.07188(4) | 0.35479(4) | 0.55802(4)  | 0.0118(3)       | 4.988 |
| O1   | 0.0956(6)  | 0.2878(6)  | 0.6972(5)   | 0.0242(12)      | 1.823 |
| O2   | 0.1224(5)  | 0.2718(6)  | 0.4524(5)   | 0.0182(11)      | 2.132 |
| O3   | 0.2379(5)  | 0.5135(5)  | 0.5609(6)   | 0.0206(12)      | 2.202 |

**Table S4a.** Selected bond distances (Å) and angles (deg) for  $\alpha$ -BaTi(IO<sub>3</sub>)<sub>6</sub>.

---

|           |            |           |            |
|-----------|------------|-----------|------------|
| Ba1-O2    | 2.802(4)   | O2-Ba1-O3 | 124.38(10) |
| Ba1-O2    | 2.802(4)   | O2-Ba1-O3 | 124.38(10) |
| Ba1-O2    | 2.802(4)   | O2-Ba1-O3 | 117.19(10) |
| Ba1-O2    | 2.802(4)   | O2-Ba1-O3 | 66.90(10)  |
| Ba1-O2    | 2.802(4)   | O2-Ba1-O3 | 55.62(10)  |
| Ba1-O2    | 2.802(4)   | O2-Ba1-O3 | 62.81(10)  |
| Ba1-O3    | 2.955(4)   | O2-Ba1-O3 | 113.10(10) |
| Ba1-O3    | 2.955(4)   | O3-Ba1-O3 | 180        |
| Ba1-O3    | 2.955(4)   | O2-Ba1-O3 | 66.90(10)  |
| Ba1-O3    | 2.955(4)   | O2-Ba1-O3 | 124.38(10) |
| Ba1-O3    | 2.955(4)   | O2-Ba1-O3 | 62.81(10)  |
| Ba1-O3    | 2.955(4)   | O3-Ba1-O3 | 111.82(12) |
| Ti1-O1    | 1.950(3)   | O2-Ba1-O3 | 113.10(10) |
| Ti1-O1    | 1.950(3)   | O2-Ba1-O3 | 55.62(10)  |
| Ti1-O1    | 1.950(4)   | O2-Ba1-O3 | 117.19(10) |
| Ti1-O1    | 1.950(4)   | O3-Ba1-O3 | 68.18(12)  |
| Ti1-O1    | 1.950(3)   | O2-Ba1-O3 | 62.81(10)  |
| I1-O1     | 1.860(4)   | O2-Ba1-O3 | 66.90(10)  |
| I1-O2     | 1.779(3)   | O2-Ba1-O3 | 55.62(10)  |
| I1-O3     | 1.805(4)   | O3-Ba1-O3 | 111.82(12) |
| O2-Ba1-O2 | 180        | O3-Ba1-O3 | 111.82(12) |
| O2-Ba1-O2 | 115.36(5)  | O2-Ba1-O3 | 62.81(10)  |
| O2-Ba1-O2 | 64.64(5)   | O2-Ba1-O3 | 66.90(10)  |
| O2-Ba1-O2 | 64.64(5)   | O2-Ba1-O3 | 55.62(10)  |
| O2-Ba1-O2 | 115.36(5)  | O3-Ba1-O3 | 68.18(12)  |
| O2-Ba1-O2 | 115.36(5)  | O3-Ba1-O3 | 68.18(12)  |
| O2-Ba1-O2 | 64.64(5)   | O3-Ba1-O3 | 68.18(12)  |
| O2-Ba1-O2 | 180.00(14) | O3-Ba1-O3 | 68.18(12)  |

---



---

|           |            |           |            |
|-----------|------------|-----------|------------|
| O2-Ba1-O2 | 64.64(5)   | O2-Ba1-O3 | 117.19(10) |
| O2-Ba1-O2 | 115.36(5)  | O2-Ba1-O3 | 113.10(10) |
| O2-Ba1-O2 | 180        | O2-Ba1-O3 | 124.38(10) |
| O2-Ba1-O2 | 115.36(5)  | O3-Ba1-O3 | 111.82(12) |
| O2-Ba1-O2 | 64.64(5)   | O3-Ba1-O3 | 111.82(12) |
| O2-Ba1-O2 | 64.64(5)   | O3-Ba1-O3 | 180        |
| O2-Ba1-O2 | 115.36(5)  | O2-I1-O3  | 101.18(17) |
| O2-Ba1-O3 | 55.62(10)  | O3-I1-O1  | 101.67(16) |
| O2-Ba1-O3 | 62.81(10)  | O2-I1-O1  | 96.12(16)  |
| O2-Ba1-O3 | 113.10(10) | O1-Ti1-O1 | 91.08(14)  |
| O2-Ba1-O3 | 124.38(10) | O1-Ti1-O1 | 88.93(14)  |
| O2-Ba1-O3 | 117.19(10) | O1-Ti1-O1 | 88.93(14)  |
| O2-Ba1-O3 | 66.90(10)  | O1-Ti1-O1 | 91.08(14)  |
| O2-Ba1-O3 | 113.10(10) | O1-Ti1-O1 | 91.08(14)  |
| O2-Ba1-O3 | 55.62(10)  | O1-Ti1-O1 | 88.92(14)  |
| O2-Ba1-O3 | 117.19(10) | O1-Ti1-O1 | 180        |
| O3-Ba1-O3 | 68.18(12)  | O1-Ti1-O1 | 180        |
| O2-Ba1-O3 | 66.90(10)  | O1-Ti1-O1 | 88.92(14)  |
| O2-Ba1-O3 | 124.38(10) | O1-Ti1-O1 | 91.08(14)  |
| O2-Ba1-O3 | 62.81(10)  | O1-Ti1-O1 | 88.92(14)  |
| O3-Ba1-O3 | 111.82(12) | O1-Ti1-O1 | 180        |
| O3-Ba1-O3 | 180        | O1-Ti1-O1 | 91.08(14)  |
| O2-Ba1-O3 | 117.19(10) | O1-Ti1-O1 | 91.07(14)  |
| O2-Ba1-O3 | 113.10(10) | O1-Ti1-O1 | 88.92(14)  |

---

**Table S4b.** Selected bond distances (Å) and angles (deg) for  $\beta$ -BaTi(IO<sub>3</sub>)<sub>6</sub>.

---

|           |            |           |            |
|-----------|------------|-----------|------------|
| Ba1-O1    | 3.031(5)   | O2-Ba1-O2 | 112.05(9)  |
| Ba1-O1    | 3.031(5)   | O2-Ba1-O1 | 172.64(13) |
| Ba1-O1    | 3.031(5)   | O2-Ba1-O1 | 61.31(13)  |
| Ba1-O2    | 3.268(5)   | O2-Ba1-O1 | 61.31(13)  |
| Ba1-O2    | 3.268(5)   | O2-Ba1-O1 | 74.47(13)  |
| Ba1-O2    | 3.268(5)   | O2-Ba1-O1 | 61.31(13)  |
| Ba1-O2    | 2.805(5)   | O1-Ba1-O1 | 112.37(8)  |
| Ba1-O2    | 2.805(5)   | O2-Ba1-O2 | 128.52(10) |
| Ba1-O2    | 2.805(5)   | O1-Ba1-O2 | 117.41(12) |
| Ti1-O3    | 1.939(4)   | O1-Ba1-O2 | 129.98(12) |
| Ti1-O3    | 1.939(4)   | O2-Ba1-O2 | 56.10(5)   |
| Ti1-O3    | 1.939(4)   | O2-Ba1-O2 | 128.52(10) |
| Ti1-O3    | 1.939(4)   | O1-Ba1-O2 | 117.41(12) |
| Ti1-O3    | 1.939(4)   | O2-Ba1-O2 | 90.75(12)  |
| Ti1-O3    | 1.939(4)   | O2-Ba1-O2 | 128.52(10) |
| I1-O1     | 1.804(5)   | O2-Ba1-O2 | 56.10(5)   |
| I1-O2     | 1.788(4)   | O1-Ba1-O2 | 129.98(12) |
| I1-O3     | 1.857(5)   | O2-Ba1-O2 | 90.75(12)  |
| O2-Ba1-O2 | 112.05(9)  | O3-Ti1-O3 | 180        |
| O2-Ba1-O2 | 112.05(9)  | O3-Ti1-O3 | 86.8(2)    |
| O2-Ba1-O1 | 74.47(13)  | O3-Ti1-O3 | 86.8(2)    |
| O2-Ba1-O1 | 172.64(13) | O3-Ti1-O3 | 86.8(2)    |
| O1-Ba1-O1 | 112.37(8)  | O3-Ti1-O3 | 93.2(2)    |
| O2-Ba1-O1 | 74.47(13)  | O3-Ti1-O3 | 86.8(2)    |
| O2-Ba1-O1 | 172.64(13) | O3-Ti1-O3 | 180        |
| O1-Ba1-O1 | 112.37(8)  | O3-Ti1-O3 | 86.8(2)    |
| O2-Ba1-O2 | 56.10(5)   | O3-Ti1-O3 | 93.2(2)    |
| O2-Ba1-O2 | 56.10(5)   | O3-Ti1-O3 | 93.2(2)    |

---

---

|           |            |           |          |
|-----------|------------|-----------|----------|
| O1-Ba1-O2 | 51.63(12)  | O3-Ti1-O3 | 86.8(2)  |
| O2-Ba1-O2 | 56.10(5)   | O3-Ti1-O3 | 93.2(2)  |
| O1-Ba1-O2 | 129.98(12) | O3-Ti1-O3 | 180      |
| O1-Ba1-O2 | 51.63(12)  | O3-Ti1-O3 | 93.2(2)  |
| O2-Ba1-O2 | 56.10(5)   | O3-Ti1-O3 | 93.2(2)  |
| O1-Ba1-O2 | 51.63(12)  | O2-I1-O1  | 100.0(2) |
| O1-Ba1-O2 | 117.41(12) | O1-I1-O3  | 95.6(2)  |
| O2-Ba1-O2 | 90.75(12)  | O2-I1-O3  | 94.9(2)  |

---

**Table S5.** The Ba<sup>2+</sup> cations coordinated and Ba-O bonds in  $\alpha$ - and  $\beta$ -BaTi(IO<sub>3</sub>)<sub>6</sub>.

| $\alpha$ -BaTi(IO <sub>3</sub> ) <sub>6</sub> |            | $\beta$ -BaTi(IO <sub>3</sub> ) <sub>6</sub> |            |
|-----------------------------------------------|------------|----------------------------------------------|------------|
| Ba1-O2                                        | 2.802(4) Å | Ba1-O1                                       | 3.031(5) Å |
| Ba1-O2                                        | 2.802(4) Å | Ba1-O1                                       | 3.031(5) Å |
| Ba1-O2                                        | 2.802(4) Å | Ba1-O1                                       | 3.031(5) Å |
| Ba1-O2                                        | 2.802(4) Å | Ba1-O2                                       | 3.268(5) Å |
| Ba1-O2                                        | 2.802(4) Å | Ba1-O2                                       | 3.268(5) Å |
| Ba1-O2                                        | 2.802(4) Å | Ba1-O2                                       | 3.268(5) Å |
| Ba1-O3                                        | 2.955(4) Å | Ba1-O2                                       | 2.805(5) Å |
| Ba1-O3                                        | 2.955(4) Å | Ba1-O2                                       | 2.805(5) Å |
| Ba1-O3                                        | 2.955(4) Å | Ba1-O2                                       | 2.805(5) Å |
| Ba1-O3                                        | 2.955(4) Å |                                              |            |
| Ba1-O3                                        | 2.955(4) Å |                                              |            |
| Ba1-O3                                        | 2.955(4) Å |                                              |            |
| (Ba) – (O) average                            | 2.878 Å    | (Ba) – (O) average                           | 3.035 Å    |

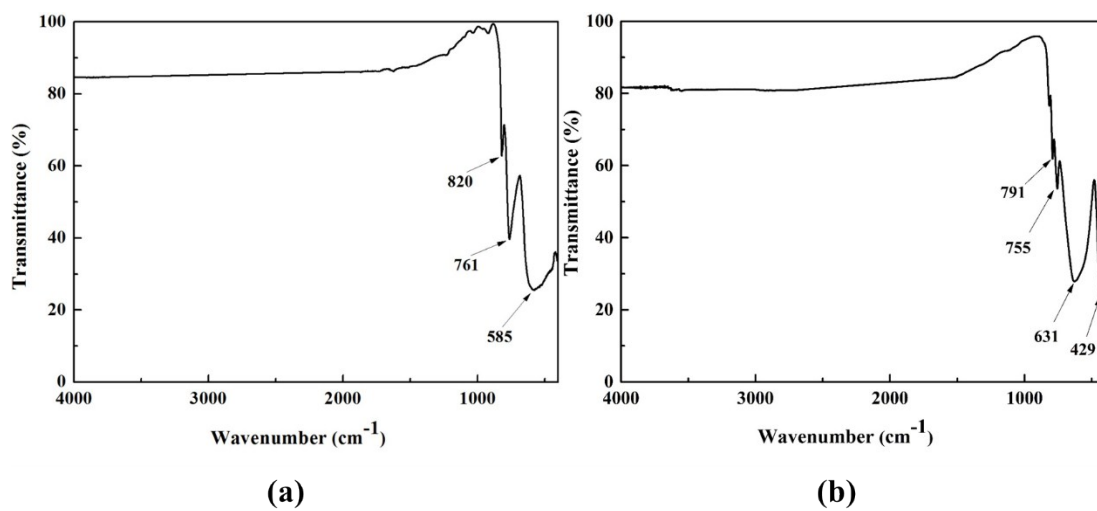

**Figure S1.** IR spectra for (a)  $\alpha$ - and (b)  $\beta$ -BaTi(IO<sub>3</sub>)<sub>6</sub>.

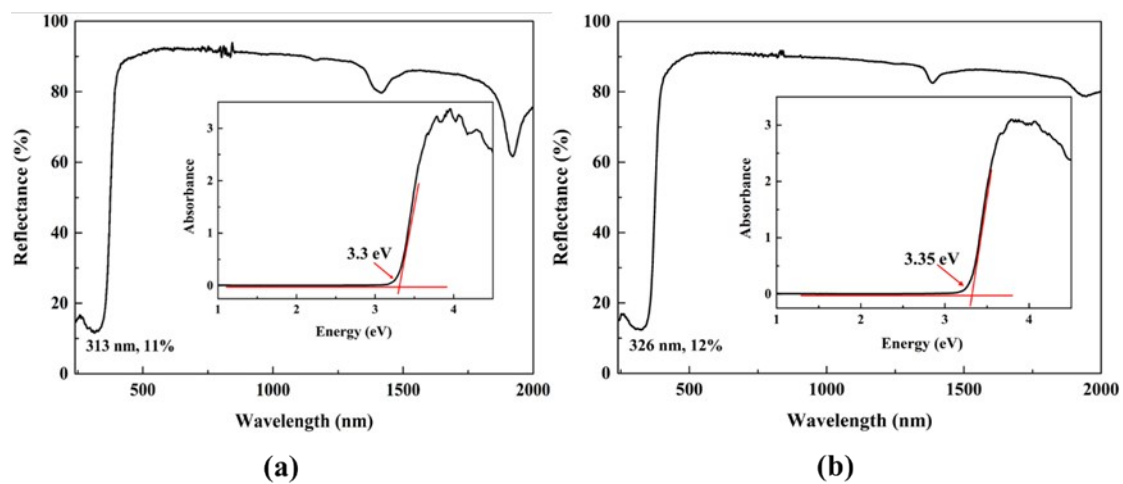

**Figure S2.** The UV-Vis-NIR diffuse reflectance spectra for (a)  $\alpha$ - and (b)  $\beta$ -BaTi(IO<sub>3</sub>)<sub>6</sub>.

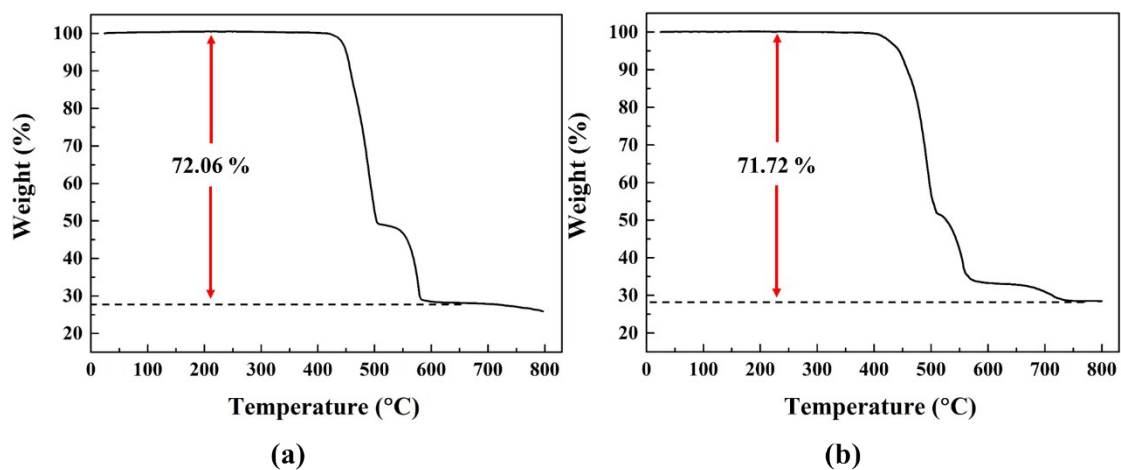

**Figure S3.** Thermogravimetric analysis diagram for (a)  $\alpha$ - and (b)  $\beta$ -BaTi(IO<sub>3</sub>)<sub>6</sub>.

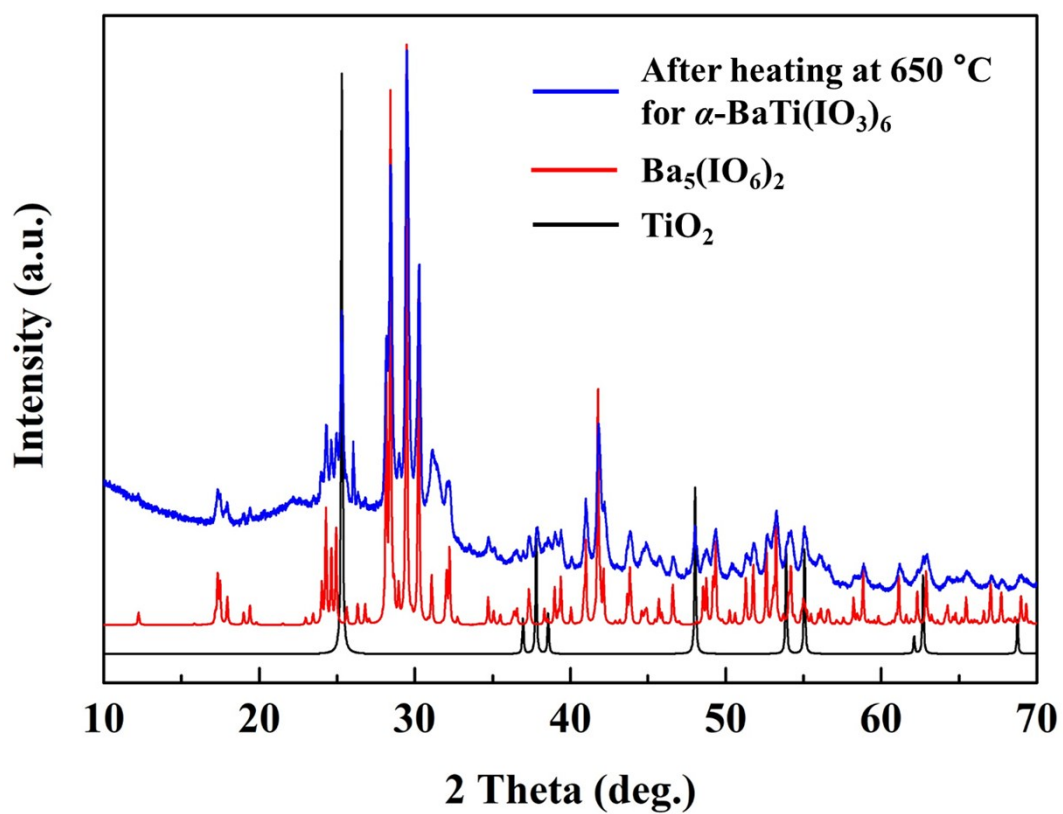

**Figure S4.**  $\alpha$ -BaTi(IO<sub>3</sub>)<sub>6</sub> decomposes above 650 °C to a mixture of Ba<sub>5</sub>(IO<sub>6</sub>)<sub>2</sub> and TiO<sub>2</sub>.
